# Supplementary material
Source: publisher figshare collection journal article supplement (https://sage.figshare.com/ndownloader/files/12370643)
Supplement: Supplementary file 1 [file 12370643]

Gimeno, H., Polatajko, H. J., Cornelius, V., Lin, J.-P., & Brown, R. G. (2018). Protocol for *N*-of-1 trials proof of concept for rehabilitation of childhood-onset dystonia: Study 1. *Canadian Journal of Occupational Therapy*, 85, 242–255. doi:10.1177/0008417417707532

## Appendix B: Trial flowchart for study 1

[illegible]

|                                       |   |  |  |  |  |  |  |  |  |  |  |  |   |  |   |  |
|---------------------------------------|---|--|--|--|--|--|--|--|--|--|--|--|---|--|---|--|
| <b>Demographic</b>                    | X |  |  |  |  |  |  |  |  |  |  |  |   |  |   |  |
| <b>BFMDRS-D</b>                       | X |  |  |  |  |  |  |  |  |  |  |  | X |  | X |  |
| <b>BFMDRS-M</b>                       |   |  |  |  |  |  |  |  |  |  |  |  |   |  |   |  |
| <b>DIS</b>                            | X |  |  |  |  |  |  |  |  |  |  |  | X |  | X |  |
| <b>Classification of brain lesion</b> | X |  |  |  |  |  |  |  |  |  |  |  |   |  |   |  |
| <b>WISC-IV</b>                        | X |  |  |  |  |  |  |  |  |  |  |  |   |  |   |  |
| <b>BADS-C</b>                         | X |  |  |  |  |  |  |  |  |  |  |  |   |  |   |  |

*Note.* ABAS = Adaptive Behavior Assessment System; AMPS = Assessment of Motor and Process Skills; BADS-C = Behavioural Assessment of Executive Syndrome in Children; BFMDRS-D = Burke-Fahn-Marsden Dystonia Rating Scale-Disability; BFMDRS-M = Burke-Fahn-Marsden Dystonia Rating Scale-Movement; BRIEF = Behavioural Rating Inventory of Executive Function; COPM = Canadian Occupational Performance Measure; DIS = Dyskinesia Impairment Scale; EQ-5D = European Quality of Life-5 dimensions; GMFCS = Gross Motor Classification System; MACS = Manual Ability Classification System; PEDI-CAT = Pediatric Evaluation Disability Inventory Computer Adaptive Test; PQRS = Performance Quality Rating Scale; SEG-P = Self-Efficacy Gauge-Paediatrics; WISC = Wechsler Intelligence Scale Children.
